# Supplementary material for: Real-time elemental analysis of liquids for process monitoring using laser-induced breakdown spectroscopy with a liquid wheel sampling approach
Source: Royal Society of Chemistry journal article supplement (doi:10.1039/d4ja00393d), 2025-01-01
Supplement: d4ja00393d1.pdf [file d4ja00393d1.pdf]

## Supporting Information

### Real-Time Elemental Analysis of Liquids for Process Monitoring Using Laser-Induced Breakdown Spectroscopy with a Liquid Wheel Sampling Approach

H. B. Andrews,<sup>1,\*</sup> Z. B. Kitzhaber,<sup>1</sup> B. T. Manard,<sup>2</sup> M.Z. Martin,<sup>3</sup> L. R. Sadergaski<sup>1</sup>

<sup>1</sup>Radioisotope Science and Technology Division, Oak Ridge National Laboratory, Oak Ridge, Tennessee, USA

<sup>2</sup>Chemical Sciences Division, Oak Ridge National Laboratory, Oak Ridge, Tennessee, USA

<sup>3</sup>Biosciences Division, Oak Ridge National Laboratory, Oak Ridge, Tennessee, USA

\*Corresponding author: [andrewshb@ornl.gov](mailto:andrewshb@ornl.gov) (H.B.A.)

Figures: 4

Tables: 3

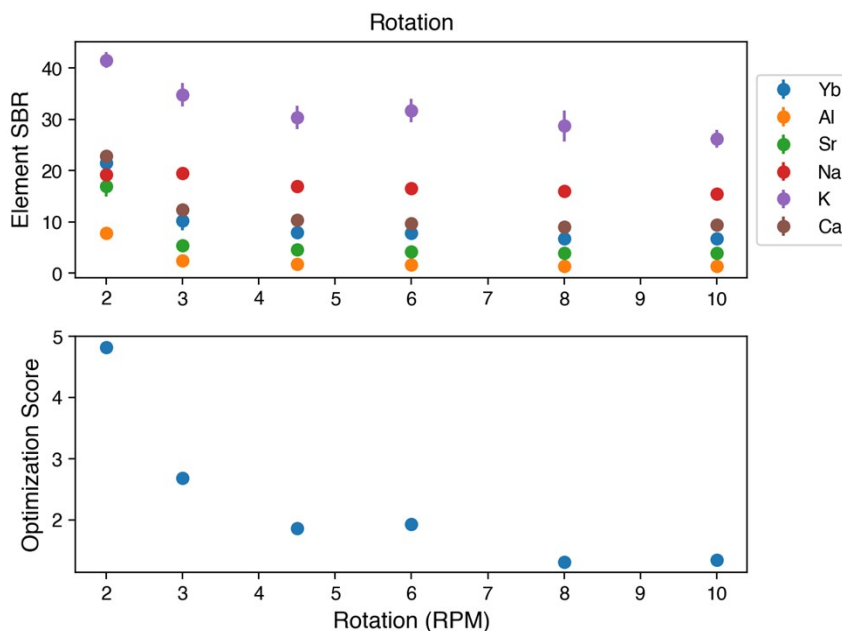

**Fig. S1.** (Top) SBR and (bottom) optimization score of analyte signals versus wheel rotation speed.

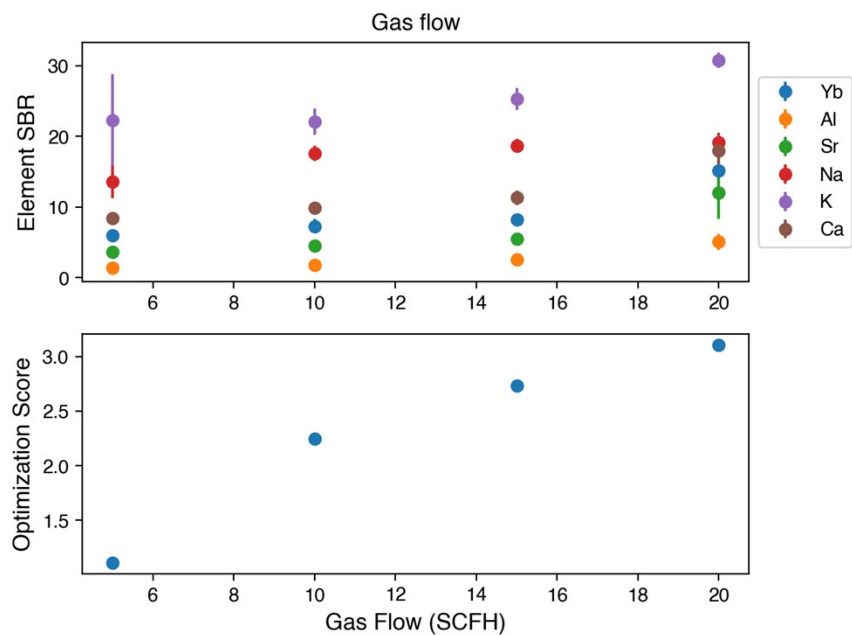

**Fig. S2.** (Top) SBR and (bottom) optimization score of analyte signals versus sheath gas flow rate.

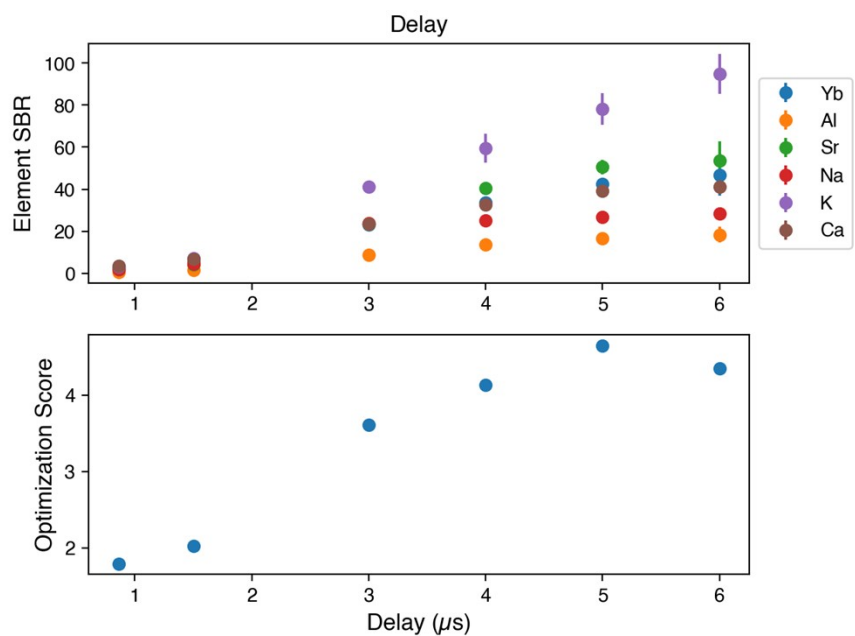

**Fig. S3.** (Top) SBR and (bottom) optimization score of analyte signals versus delay time.

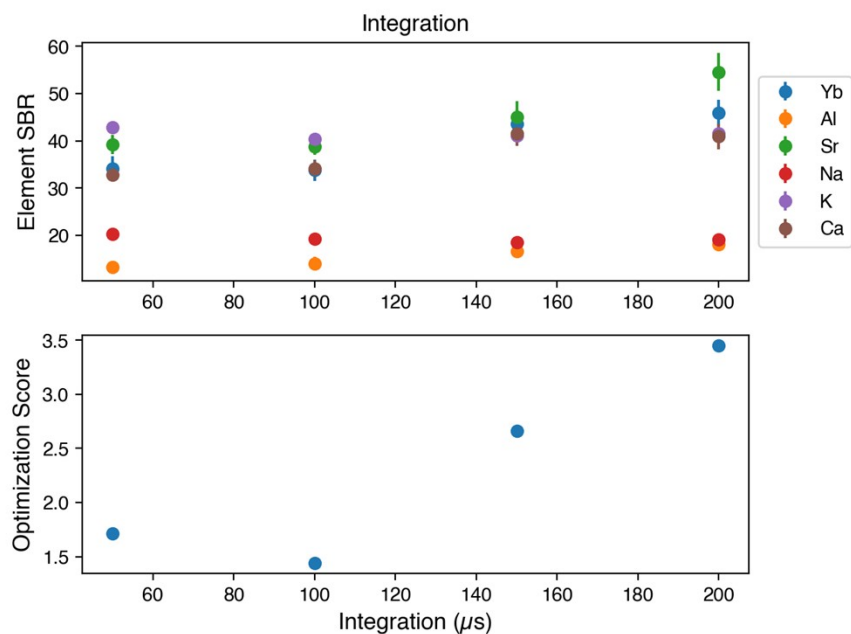

**Fig. S4.** (Top) SBR and (bottom) optimization score of analyte signals versus integration time.

**Table S1. ICP-OES calibration sample analysis.**

| Analyte | Concentration ( $\mu\text{g mL}^{-1}$ ) |                    |
|---------|-----------------------------------------|--------------------|
|         | ICP-OES mean                            | Standard deviation |
| Na      | 219.8                                   | 6.375              |
| Al      | 428.6                                   | 33.86              |
| K       | 317.0                                   | 26.31              |
| Ca      | 347.6                                   | 12.86              |
| Ti      | 858.2                                   | 40.34              |
| Sr      | 363.9                                   | 31.29              |
| Mo      | 906.7                                   | 23.57              |
| Yb      | 799.1                                   | 32.76              |

**Table S2. PLSR model information.**

| Analyte | Wavelengths (nm) | Number of latent variables |
|---------|------------------|----------------------------|
| Na      | 300–700          | 2                          |
| Al      | 350–400          | 6                          |
| K       | 300–800          | 3                          |
| Ca      | 300–400          | 2                          |
| Ti      | 300–350          | 7                          |
| Sr      | 300–500          | 4                          |
| Mo      | 525–575          | 8                          |
| Yb      | 300–400          | 6                          |

**Table S3. Real-time PLSR model information.**

| <b>Analyte</b> | <b>Wavelengths (nm)</b> | <b>Number of latent variables</b> |
|----------------|-------------------------|-----------------------------------|
| Na             | 300–700                 | 4                                 |
| K              | 300–800                 | 4                                 |
| Ca             | 300–400                 | 2                                 |
| Sr             | 300–500                 | 4                                 |

*Note: spectra were normalized to total light.*
